# Supplementary material for: Adding sea ice effects to a global operational model (NEMO v3.6) for forecasting total water level: approach and impact
Source: Copernicus journal article supplement (doi:10.5194/gmd-16-3335-2023), 2023-06-14
Supplement: Supplementary file 1 [file gmd-16-3335-2023-supplement.pdf]

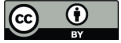

*Supplement of*

## **Adding sea ice effects to a global operational model (NEMO v3.6) for forecasting total water level: approach and impact**

**Pengcheng Wang and Natacha B. Bernier**

*Correspondence to:* Pengcheng Wang ([pengcheng.wang@ec.gc.ca](mailto:pengcheng.wang@ec.gc.ca))

The copyright of individual parts of the supplement might differ from the article licence.

## Summary of seasonal modulations for $M_2$ , $S_2$ , $K_1$ and $O_1$

Figure S1 (right two columns) summarizes the observed and predicted seasonal modulations in March relative to September ( $\Delta\tilde{A}_{\text{Mar}}$ ,  $\Delta\phi_{\text{Mar}}$ ) as a function of station code for four major tidal constituents ( $M_2$ ,  $S_2$ ,  $K_1$  and  $O_1$ ). For reference, the amplitudes in September are also given in the left column. The impact of adding ice effects on  $S_2$  is very similar to that on  $M_2$  (top two rows; see main text for details). We note that the seasonal modulation of  $S_2$  also has a non-negligible astronomical contribution from its neighbouring constituent  $T_2$ , which has one cycle per year (cpy) below  $S_2$ . The amplitude of the astronomical  $T_2$  is about 5.8% of  $S_2$  (Cartwright and Tayler, 1971). The superposition of  $S_2$  and  $T_2$  explains the bulk of the observed  $\Delta\tilde{A}_{\text{Mar}}$  (middle column, second row) of about 7% for  $S_2$  at stations 47-52 and 54-58 in the Gulf of St. Lawrence (We note that at station 53, the signal is also present but the SNR is below 2 and thus neglected). This modulation is missed by our model as it does not include  $T_2$ .

The impacts of adding ice effects for  $K_1$  and  $O_1$  (bottom two rows) are also similar. Large improvements (20–40% in amplitude, 15–40° in phase) are found at station 18 in the Russian Arctic, and stations 6–8 in the CAA except for an overestimated  $\Delta\tilde{A}_{\text{Mar}}$  for  $O_1$  at station 8. Adding ice effects also improves the phase modulation (15–30°) at Nome, Alaska (station 15), but the predicted amplitude modulations are underestimated by about 35% for both  $K_1$  and  $O_1$ . Egbert and Ray (2017) showed that the non-tidal variability at Nome is large compared to tides, implying potential effects of the nonlinear tide-surge interaction (TSI). We speculate that the observed large modulations of  $K_1$  and  $O_1$  are affected by both sea ice and the TSI. Both are not well captured locally (the model underestimates the amplitudes of  $K_1$  and  $O_1$ , by up to half in ice-free months). It is also interesting to note that in contrast, the semidiurnal tides do not display large modulations. This may be attributed in part to the more complex semidiurnal amphidrome systems over this region (see the left panel of Fig. 9 in the main text), characterized with smaller wavelength than diurnal tides.

For other stations, the impact of adding ice effects is generally negligible, and there are no significant modulations for  $O_1$  in both observations and predictions.  $K_1$ , however, is more complicated: observations show moderate amplitude modulations (7-20%) along the Norwegian coast (stations 23–26), in the HB (stations 37–40) and the Gulf of St. Lawrence (stations 48–58), which are missed or underestimated by both model runs. A year-long analysis of observed TWL reveals anomalously high energy (up to 12% of  $K_1$ ) at neighbouring constituents  $S_1$  and  $\psi_1$ , each 1 cpy from  $K_1$ . As the astronomical  $S_1$  and  $\psi_1$  are known to be small (Ray et al., 2021), the cause is likely due to other processes (e.g., shallow water processes and climate processes, Ray, 2022) that are not fully captured in our model.

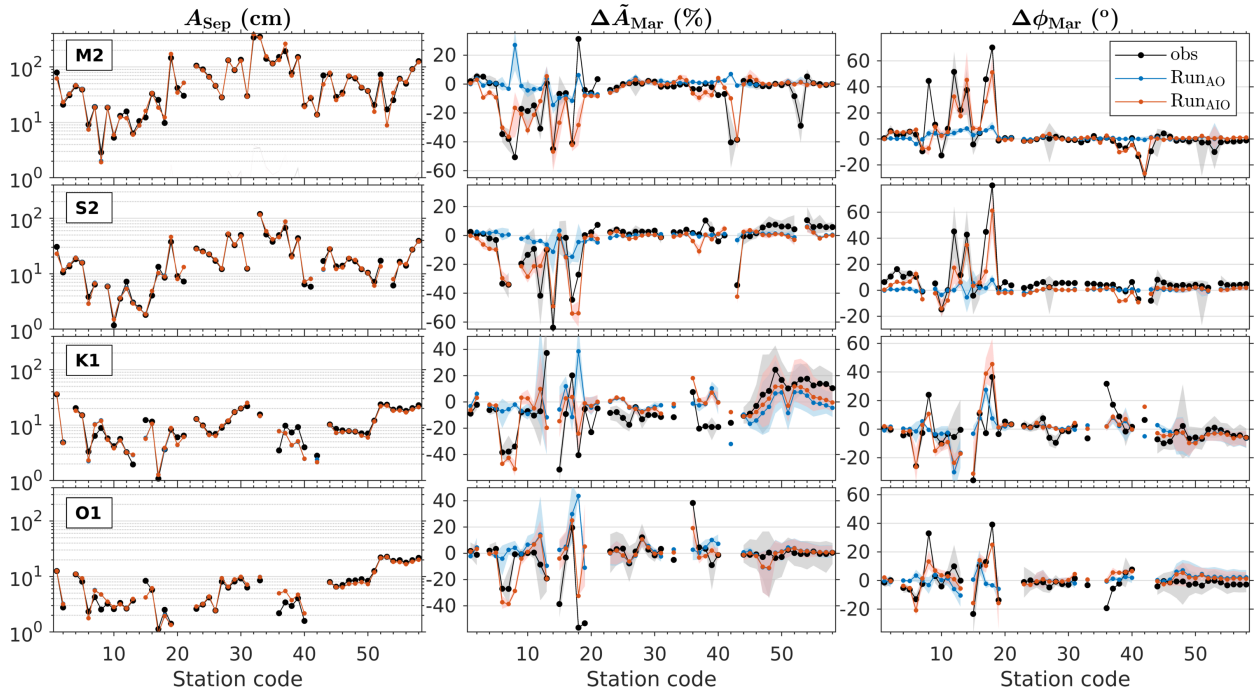

**Figure S1.** Tidal amplitude in September ( $A_{\text{Sep}}$ , left panels), the modulation in amplitude ( $\Delta\tilde{A}_{\text{Mar}}$ , middle panels) and phase ( $\Delta\phi_{\text{Mar}}$ , right panels) in March relative to September for four major tidal constituents ( $M_2$ ,  $S_2$ ,  $K_1$ , and  $O_1$ ) observed and predicted by  $\text{Run}_{\text{AO}}$  and  $\text{Run}_{\text{AIO}}$  (see Fig. 1 for station code). Shaded area indicates the 10-90 percentile range. Only stations with SNR greater than 2 are plotted.

## References

- 30 Cartwright, D. and Tayler, R.: New computations of the tide-generating potential, *Geophysical Journal International*, 23, 45–73, 1971.
- Egbert, G. D. and Ray, R. D.: 'Tidal prediction' in *The Sea: The Science of Ocean Prediction*, *Journal of Marine Research*, 75, 189–237, 2017.
- Ray, R.: Technical note: On seasonal variability of the  $M_2$  tide, *Ocean Science*, 18, 1073–1079, 2022.
- Ray, R., Boy, J., Arbic, B., Egbert, G., Erofeeva, S., Petrov, L., and Shriver, J.: The problematic  $\Psi_1$  ocean tide, *Geophysical Journal International*, 227, 1181–1192, 2021.
